# Supplementary material
Source: PubMed Central journal article supplement (PMC6018338)
Supplement: JCM.00053-18_zjm999095991s1.pdf [file JCM.00053-18_zjm999095991s1.pdf]

SUPPLEMENTARY TABLE S1; CLINICAL-, REFERENCE- AND TYPE STRAINS OF STUDY; ORIGIN; EXPERIMENTS; ACC. N°

| Strain [serotype]                                   | Other designation                                | Source             | Origin       | MALDI<br>Logscore | Phenotype<br>(Table 2) | MALDI<br>(Fig. 1) | WGS (Fig<br>2, 3;<br>Table 1) | Auto-<br>aggregation<br>(Fig. 4) | GenBank accession<br>N° |
|-----------------------------------------------------|--------------------------------------------------|--------------------|--------------|-------------------|------------------------|-------------------|-------------------------------|----------------------------------|-------------------------|
| <b><i>Aggregatibacter actinomycetemcomitans</i></b> |                                                  |                    |              |                   |                        |                   |                               |                                  |                         |
| NCTC 9710 <sup>T</sup> [Stc]                        | CCUG_13227 <sup>T</sup> ;<br>HK_443 <sup>T</sup> | Abscess            | Denmark 1955 |                   | +                      | +                 |                               |                                  |                         |
| 1G [Stb]                                            |                                                  | Subgingival plaque | Ghana 2012   |                   | +                      |                   |                               | +                                |                         |
| 212G [Stb]                                          |                                                  | Subgingival plaque | Ghana 2012   |                   | +                      |                   |                               | +                                |                         |
| 488G [Stb]                                          |                                                  | Subgingival plaque | Ghana 2012   |                   | +                      |                   |                               |                                  |                         |
| 640G [Stb]                                          |                                                  | Subgingival plaque | Ghana 2012   |                   | +                      |                   |                               |                                  |                         |
| HK_929 [Ste]                                        | SA_1075;<br>CCUG_51668                           | Subgingival plaque | Finland 1992 |                   |                        |                   | +                             | +                                | NRDG00000000            |
| HK_961 [Ste]<br>(Clade e')                          |                                                  | Abscess            | Denmark 1957 | +                 |                        | +                 | +                             |                                  | NRDF00000000            |
| HK_1002 [Std]                                       | CCUG12604                                        | Endocarditis       | Sweden 1982  | +                 | +                      |                   | +                             | +                                | NRDE00000000            |
| HK_1651 [Stb]                                       | CCUG_49496                                       | Subgingival plaque |              | +                 |                        | +                 | (REF)                         | +                                | GCA_000604045.1         |
| PN_437 [Sta]                                        | Aal08-91272                                      | Blood              | Denmark 2008 |                   | +                      |                   |                               | +                                |                         |
| PN_561 [Ste]<br>(Clade e')                          | Her05-6229                                       | Blood              | Denmark 2005 |                   | +                      |                   |                               | +                                |                         |
| PN_686 [Stc]                                        | B11-031293                                       | Blood              | Denmark 2011 | +                 |                        | +                 |                               |                                  |                         |
| PN_687 [Stb]                                        | B12-138863                                       | Blood              | Denmark 2012 | +                 |                        | +                 |                               | +                                |                         |
| PN_696 [Sta]                                        | B10-001802                                       | Blood              | Denmark 2010 |                   |                        |                   |                               |                                  |                         |
| PN_740 [Sta]                                        | Hvi06-2977710                                    | Blood              | Denmark 2006 |                   |                        |                   |                               | +                                |                         |
| PN_800 [Stc]                                        | J16-10084                                        | Brain abscess      | Denmark 2016 |                   |                        |                   | +                             | +                                | NRDD00000000            |

| Strain                                    | Other designation                                | Source                                               | Origin          | MALDI<br>Logscore | Phenotype<br>(Table 2) | MALDI<br>(Fig. 1) | WGS (Fig<br>2, 3;<br>Table 1) | Auto-<br>aggregation<br>(Fig. 4) | GenBank accession<br>N <sup>o</sup> |
|-------------------------------------------|--------------------------------------------------|------------------------------------------------------|-----------------|-------------------|------------------------|-------------------|-------------------------------|----------------------------------|-------------------------------------|
| <b><i>Aggregatibacter aphrophilus</i></b> |                                                  |                                                      |                 |                   |                        |                   |                               |                                  |                                     |
| NCTC_5906 <sup>T</sup>                    | ATCC_33389 <sup>T</sup> ;<br>HK_372 <sup>T</sup> | Endocarditis                                         | England 1939    |                   | +                      | +                 | (REF)                         |                                  | AEWB00000000.2                      |
| NJ_8700                                   |                                                  | Oral flora, healthy<br>individual                    | US, before 2009 |                   |                        |                   | (REF)                         |                                  | NC_012913.1                         |
| ATCC_7901                                 | Pittman 429                                      | Spinal fluid, child with<br>brain abscess            | US 1932         |                   |                        |                   | (REF)                         |                                  | MAQE01000001.1                      |
| ATCC_19415                                | NCTC 5886                                        | Endocarditis (same<br>case, NCTC_5906 <sup>T</sup> ) | UK 1938         |                   |                        |                   | (REF)                         |                                  | MAQF01000001.1                      |
| W10413                                    |                                                  | Oral flora, healthy<br>individual                    | UK 2011         |                   |                        |                   | (REF)                         |                                  | NZ_CP012067.1                       |
| CCUG 11575                                |                                                  | Brain abscess                                        | Sweden 1981     | +                 |                        |                   | +                             |                                  | NRDC00000000                        |
| HK_319                                    | CCUG_51588                                       | Dental plaque                                        | Denmark 1975    |                   | +                      |                   | +                             | +                                | NRDB00000000                        |
| PN_444                                    | Aal08-40496                                      | Brain abscess                                        | Denmark 2008    |                   |                        |                   | +                             |                                  | NRDA00000000                        |
| PN_445                                    | Aal09-172035                                     | Blood                                                | Denmark 2009    |                   | +                      |                   |                               | +                                |                                     |
| PN_517                                    | HerP93-91985b                                    | Wound, finger                                        | Denmark 1993    | +                 |                        | +                 | +                             |                                  | NRCZ00000000                        |
| PN_521                                    | HerP04-258186                                    | Wound, finger                                        | Denmark 2004    | +                 | +                      | +                 | +                             |                                  | NRCY00000000                        |
| PN_536                                    | HerE13-1184878                                   | Blood                                                | Denmark 2013    | +                 | +                      | +                 |                               |                                  |                                     |
| PN_537                                    | hERE14-1214340                                   | Abdominal abscess                                    | Denmark 2014    |                   |                        |                   |                               | +                                |                                     |
| PN_642                                    | Mid14-V93965                                     | Blood                                                | Denmark 2014    |                   | +                      |                   |                               | +                                |                                     |
| PN_662                                    | Esb01-029628                                     | Blood                                                | Denmark 2001    |                   |                        |                   |                               | +                                |                                     |
| PN_732                                    | Hvi09-9212299                                    | Blood                                                | Denmark 2009    |                   |                        |                   |                               | +                                |                                     |
| PN_789                                    | Aal12-210                                        | Blood                                                | Denmark 2012    |                   | +                      |                   |                               | +                                |                                     |
| PN_810                                    | J16-27185                                        | Abdominal abscess                                    | Denmark 2016    | +                 | +                      |                   |                               | +                                |                                     |
| PN_813                                    | A98-55940                                        | Brain abscess                                        | Denmark 1998    |                   |                        |                   |                               | +                                |                                     |
| PN_816                                    | A97-88457-I                                      | Brain abscess                                        | Denmark 1997    |                   |                        |                   |                               | +                                |                                     |
| RH01                                      | CCUG_49403                                       | Brain abscess                                        | Denmark 2001    |                   |                        |                   | +                             |                                  |                                     |

| Strain                                         | Other designation                                    | Source                      | Origin           | MALDI<br>Logscore | Phenotype<br>(Table 2) | MALDI<br>(Fig. 1) | WGS (Fig<br>2, 3;<br>Table 1) | Auto-<br>aggregation<br>(Fig. 4) | GenBank accession<br>N <sup>o</sup> |
|------------------------------------------------|------------------------------------------------------|-----------------------------|------------------|-------------------|------------------------|-------------------|-------------------------------|----------------------------------|-------------------------------------|
| <b><i>Aggregatibacter segmis</i></b>           |                                                      |                             |                  |                   |                        |                   |                               |                                  |                                     |
| NCTC 10977 <sup>T</sup>                        | ATCC_33393 <sup>T</sup> ;<br>HK_316 <sup>T</sup>     | Dental plaque               | Denmark 1975     |                   | +                      | +                 | (REF)                         |                                  | AEPS00000000.1                      |
| CCUG 46700                                     |                                                      | Abscess                     | Sweden 2002      | +                 |                        |                   | +                             | +                                | NRCX00000000                        |
| HK 296                                         | CCUG_51794                                           | Sputum                      | Denmark 1973     | +                 | +                      | +                 | +                             | +                                | NRCW00000000                        |
| HK 321                                         | CCUG_49495                                           | Dental plaque               | Denmark 1975     |                   |                        | +                 |                               | +                                |                                     |
| PN_447                                         | Aal13-91467                                          | Blood                       | Denmark 2013     |                   |                        |                   |                               | +                                |                                     |
| PN_450                                         | Aal00-106911                                         | Blood                       | Denmark 2000     |                   |                        |                   | +                             |                                  | NRCV00000000                        |
| PN_487                                         | Her03-178563                                         | Blood                       | Denmark 2003     |                   | +                      |                   |                               | +                                |                                     |
| PN_533                                         | HerVV12-6670                                         | Pus, appendicitis           | Denmark 2012     | +                 |                        |                   |                               | +                                |                                     |
| PN_635                                         | Mid03-V70389                                         | Blood                       | Denmark 2003     | +                 | +                      |                   |                               | +                                |                                     |
| PN_651                                         | Ode13-325455                                         | Blood                       | Denmark 2013     |                   | +                      | +                 | +                             |                                  | NRCU00000000                        |
| PN_675                                         | 09-B030783                                           | Blood                       | Denmark 2009     |                   | +                      |                   |                               | +                                |                                     |
| PN_754                                         | Sja-Y04009883                                        | Blood                       | Denmark 2004     | +                 | +                      |                   |                               | +                                |                                     |
| PN_811                                         | A15-18426                                            | Wound, back                 | Denmark 2015     |                   | +                      | +                 |                               | +                                |                                     |
| <b><i>Aggregatibacter kilianii</i> sp.nov.</b> |                                                      |                             |                  |                   |                        |                   |                               |                                  |                                     |
| PN 528 <sup>T</sup>                            | CCUG_70536 <sup>T</sup> ;<br>DSM_105094 <sup>T</sup> | Abdominal abscess           | Denmark 2009     | +                 | +                      | +                 | +                             | +                                | NRCN00000000                        |
| MELO_68                                        | GB_KC866153                                          | Pus, dacrocystitis          | Switzerland 1996 | +                 | +                      | +                 | +                             | +                                | NRCT00000000                        |
| MELO_83                                        | GB_KC866151                                          | Maxillary sinus             | Switzerland 2000 | +                 | +                      | +                 | +                             | +                                | NRCS00000000                        |
| MELO_94                                        | GB_KC866155                                          | Conjunctivitis              | Switzerland 2000 | +                 | +                      | +                 | +                             | +                                | NRCR00000000                        |
| PN 452                                         | Aal12-P/014757                                       | Pus, eye                    | Denmark 2012     | +                 | +                      | +                 | +                             | +                                | NRCQ00000000                        |
| PN 516                                         | Her93-P2/091985                                      | Wound, finger               | Denmark 1993     | +                 | +                      | +                 | +                             | +                                | NRCP00000000                        |
| PN 522                                         | Her05-P2/023452                                      | Conjunctiva                 | Denmark 2005     | +                 | +                      | +                 | +                             | +                                | NRCO00000000                        |
| PN 537                                         | HerVV14-1214340                                      | Periappendicular<br>abscess | Denmark 2014     | +                 | +                      | +                 | +                             | +                                | NRCM00000000                        |
| PN 649                                         | Ode14-925921                                         | Blood                       | Denmark 2014     | +                 | +                      | +                 | +                             | +                                | NRCL00000000                        |
| PN 755                                         | Sja-Y08027542                                        | Blood                       | Denmark 2008     | +                 | +                      | +                 | +                             | +                                | NRCK00000000                        |
